# Supplementary material
Source: Springer Nature journal article supplement (https://www.springermedizin.de/resource/supplementary/13063_2014_2215_MOESM1_ESM.pdf/9621640)
Supplement: MOESM1 [file 9621640]

**Visit 1-2****Visit 3****Visit 4****Visit 5****2012-2013 Season****Visit 6***Week 0**Week 5**Week 10**Week 15*

Screening

Randomization

Standard Dose  
(Arm A & B)Booster Dose  
(Arm B)

Immunogenicity Evaluation

Drug Safety Evaluation
